# Supplementary material for: Facile fabrication of bimetallic Fe–Mg MOF for the synthesis of xanthenes and removal of heavy metal ions
Source: PubMed Central journal article supplement — RSC Adv. 2020 Mar 6;10(16):9693–703. doi: 10.1039/c9ra10300g (PMC9050136; doi:10.1039/c9ra10300g), 2020-03-06
Supplement: RA-010-C9RA10300G-s001.pdf [file RA-010-C9RA10300G-s001.pdf]

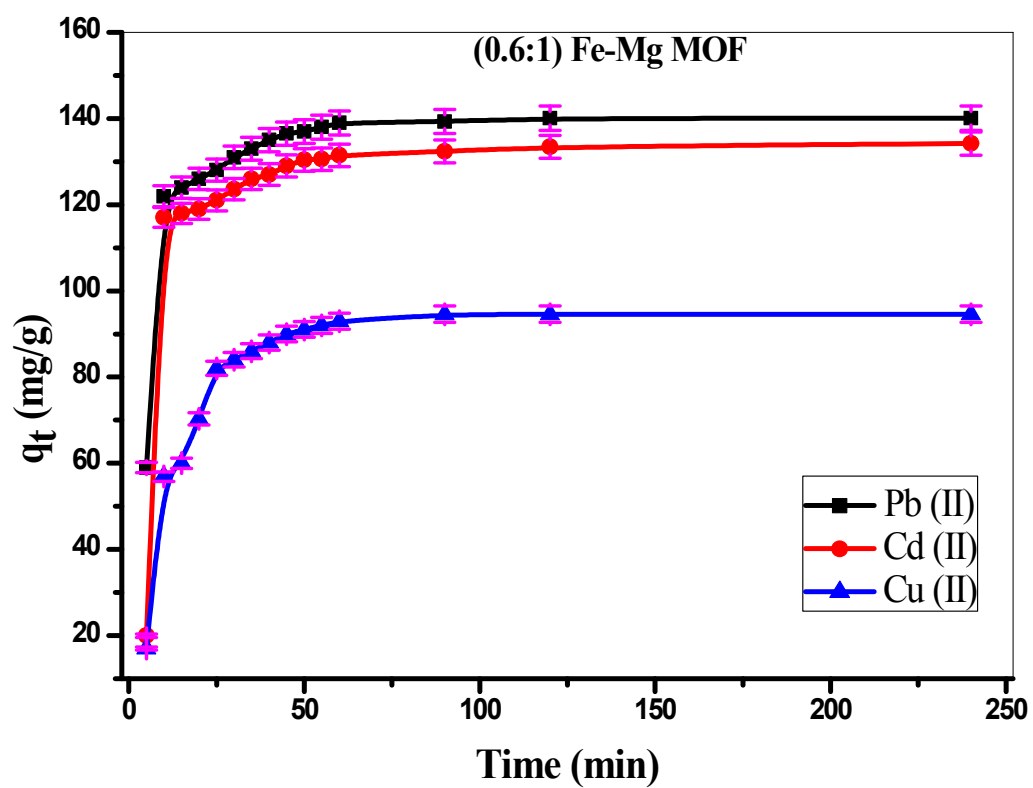

**Fig.S1.** Effect of contact time on the uptake of the heavy metal ions on MOF. The error bars represent the standard error.

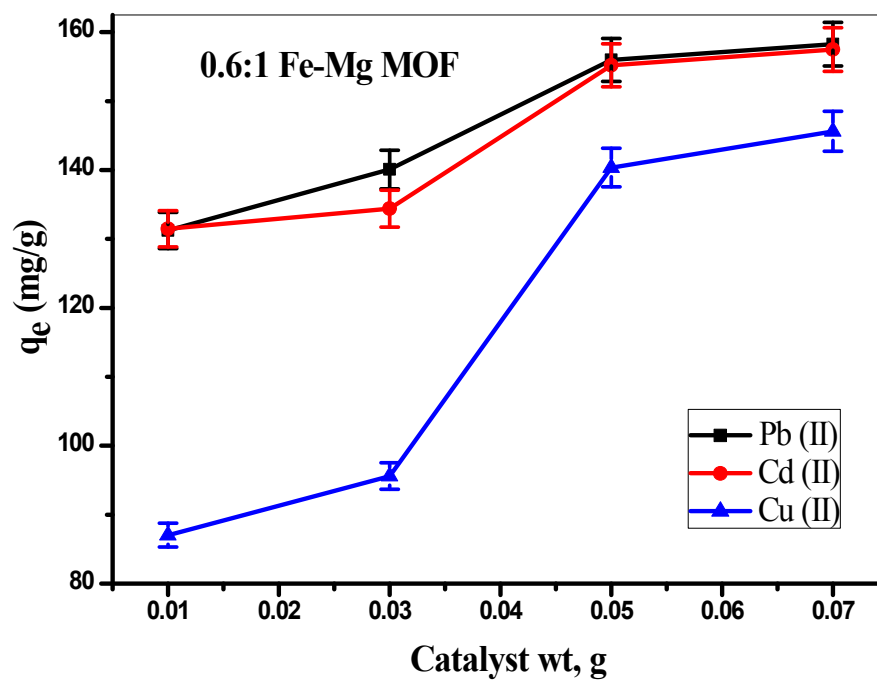

**Fig.S2.** Effect of MOF weight on adsorption of heavy metal ions. The error bars represent the standard error.

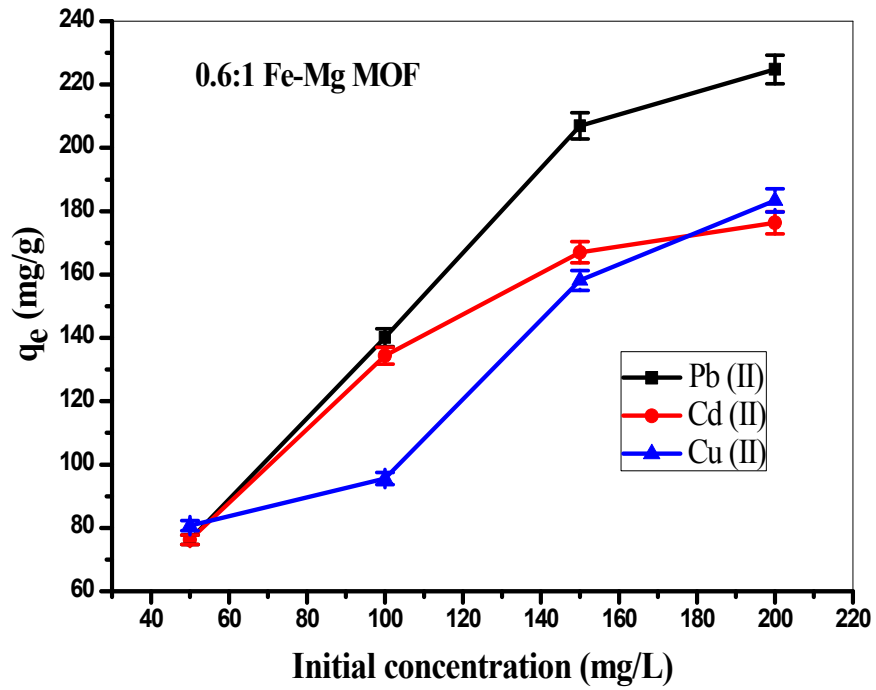

**Fig.S3.** Effect of the initial concentration of Pb(II), Cd(II) and Cu(II) ions on the adsorption process. The error bars represent the standard error.

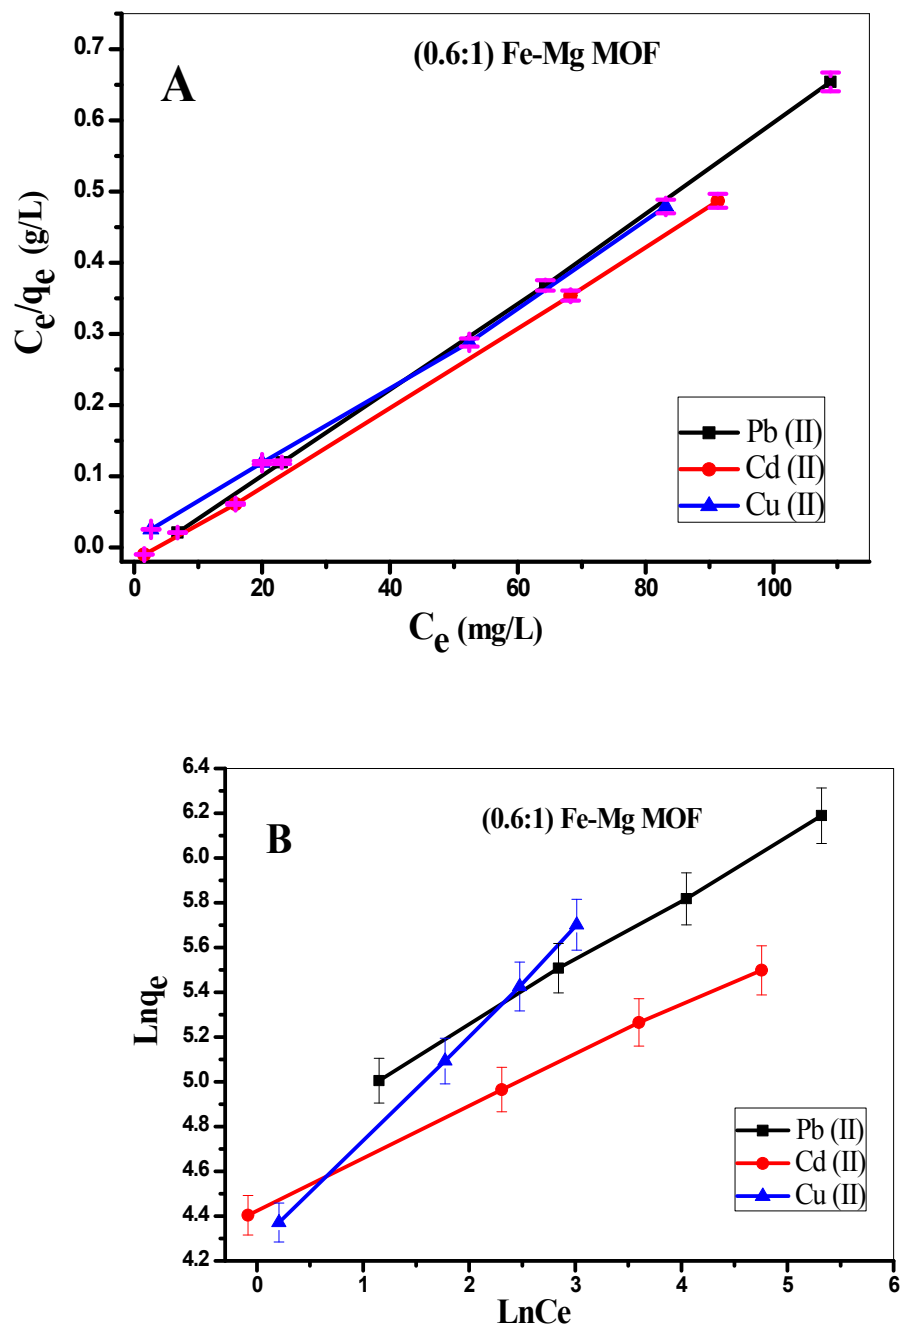

**Fig.S4.** (A) Langmuir and (B) Freundlich isotherms for the adsorption of heavy metal ions on MOFs. The error bars represent the standard error.

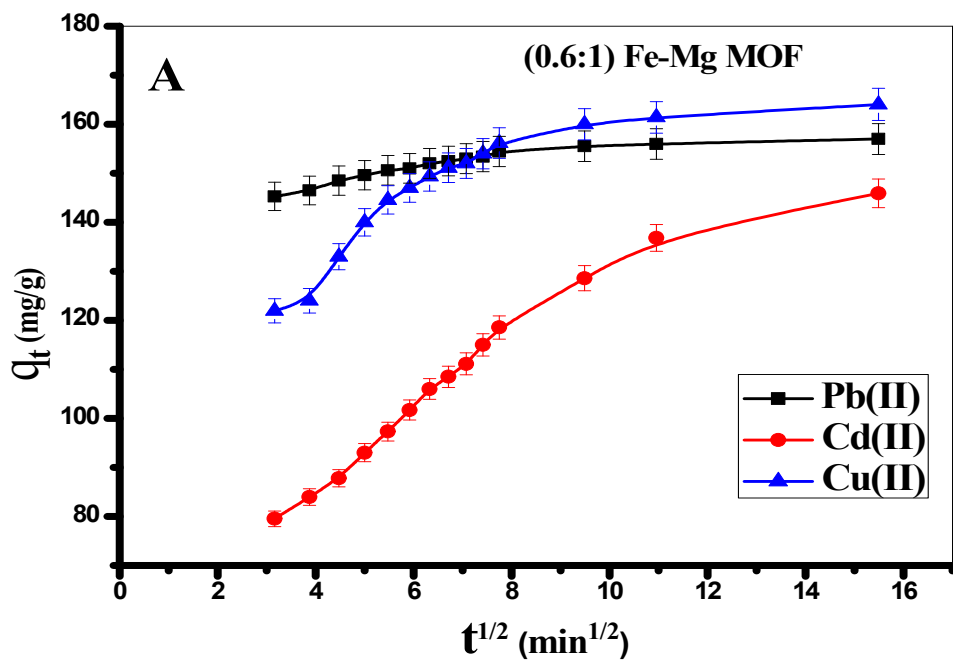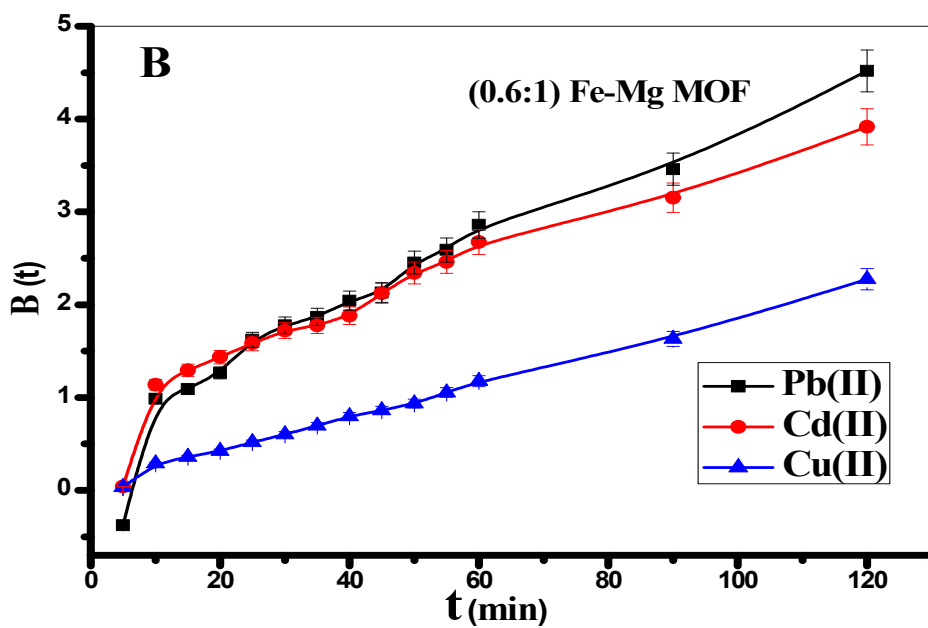

**Fig.S5.** (A) Intraparticle diffusion and (B) Boyd plot of Pb(II), Cd(II) and Cu(II) using (0.6:1) Fe–Mg MOF sample. The error bars represent the standard error.
